# Supplementary material for: Femtosecond excited state dynamics of stilbene–viologen complexes with a weakly pronounced charge transfer
Source: Royal Society of Chemistry journal article supplement (doi:10.1039/d0pp00034e), 2020-07-23
Supplement: d0pp00034e1.pdf [file d0pp00034e1.pdf]

## Supplemental Information

### Femtosecond Excited State Dynamics of Stilbene–Viologen Complexes with a Weakly Pronounced Charge Transfer

Mikhail V. Rusalov<sup>\*,a</sup>, Valery V. Volchkov<sup>a</sup>, Vladimir L. Ivanov<sup>a</sup>, Mikhail Ya. Melnikov<sup>a</sup>, Fedor E. Gostev<sup>b</sup>, Ivan V. Shelaev<sup>b</sup>, Victor A. Nadtochenko<sup>a,b</sup>, Artem I. Vedernikov<sup>c</sup>, Sergey P. Gromov<sup>a,c</sup>, Michael V. Alfimov<sup>c</sup>

<sup>a</sup>Chemistry Department, M. V. Lomonosov Moscow State University, Leninskie Gory 1-3, Moscow 119991, Russian Federation; phone: +7 (495) 9391671; fax: +7 (495) 9328846; e-mail: mvrusalov@yandex.ru

<sup>b</sup>N. N. Semenov Institute of Chemical Physics, Russian Academy of Sciences, Kosygina str. 4, Moscow 119991, Russian Federation; phone: +7 (495) 9397347; fax: +7 (499) 1378357

<sup>c</sup>Photochemistry Center, Federal Scientific Research Center "Crystallography and Photonics", Russian Academy of Sciences, Novatorov str. 7A-1, Moscow 119421, Russian Federation; phone: +7 (495) 9350116; fax: +7 (495) 9361255

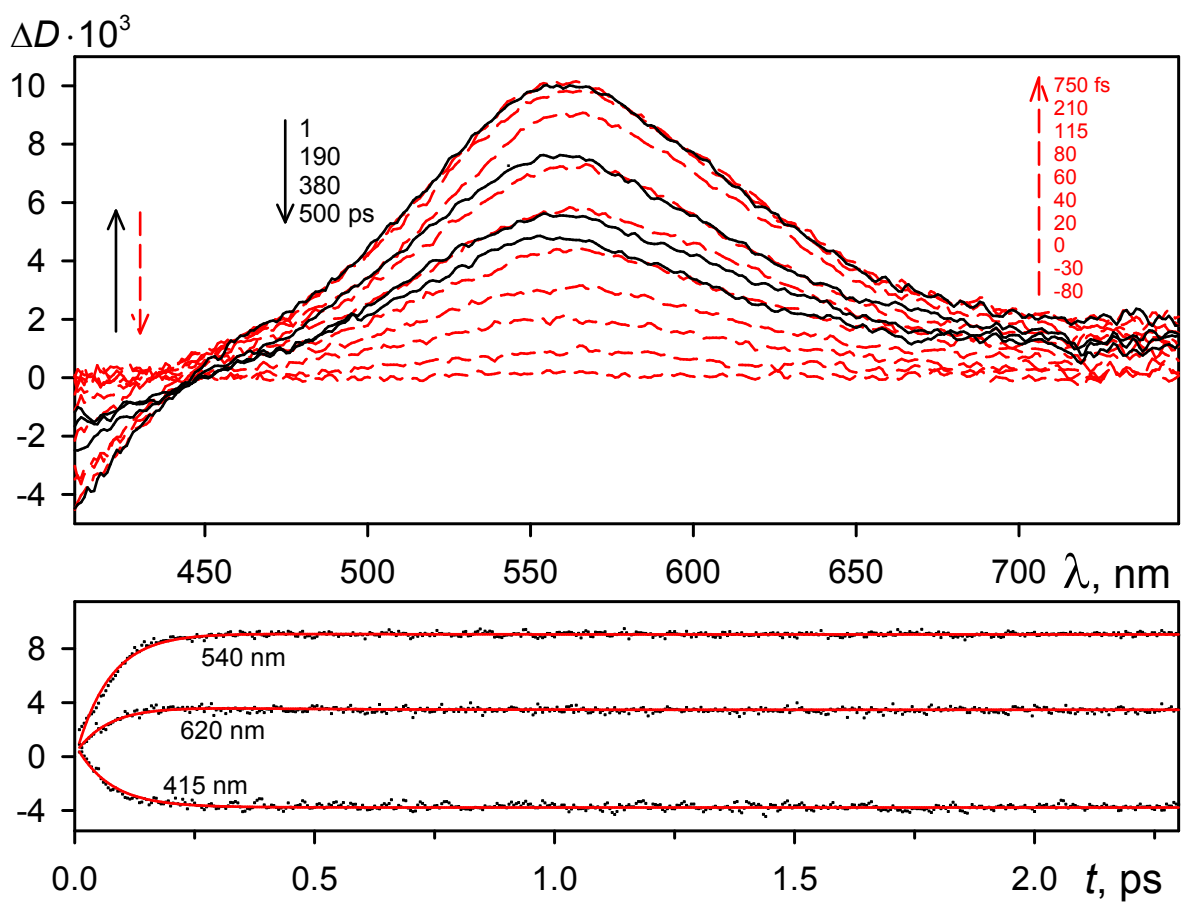

**Fig. S1** *Top panel:* The dynamics of transient absorption spectra of **D** ( $C = 5 \times 10^{-4}$  M), which correspond to -80–750 fs delays (red dash lines) and to 1–500 ps delays (black solid lines), after the excitation by 330 nm, 30 fs laser pulse. *Bottom panel:* The kinetic curves of transient absorption spectra for several wavelengths. The red solid lines represent fitting by two-exponential function with characteristic times 56 fs and 240 fs.

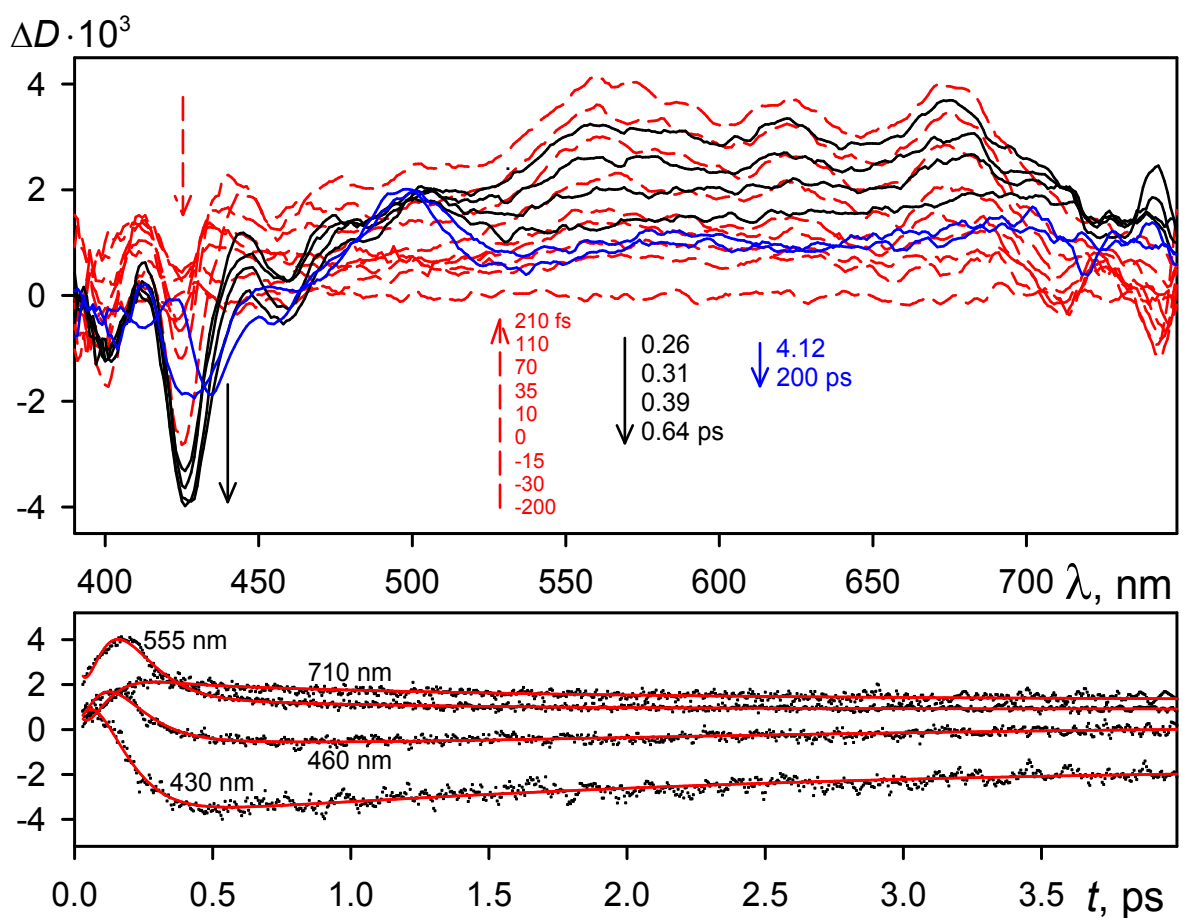

**Fig. S2** *Top panel:* The dynamics of transient absorption spectra of **A1** ( $C = 2 \times 10^{-4}$  M), which correspond to -200–210 fs delays (red dash lines), 260–640 fs delays (black solid lines) and 4–200 ps (blue solid lines), after the excitation by 320 nm, 30 fs laser pulse. *Bottom panel:* The kinetic curves of transient absorption spectra for several wavelengths. The red solid lines represent fitting by three-exponential function with characteristic times 80 fs, 170 fs and 1.5 ps.

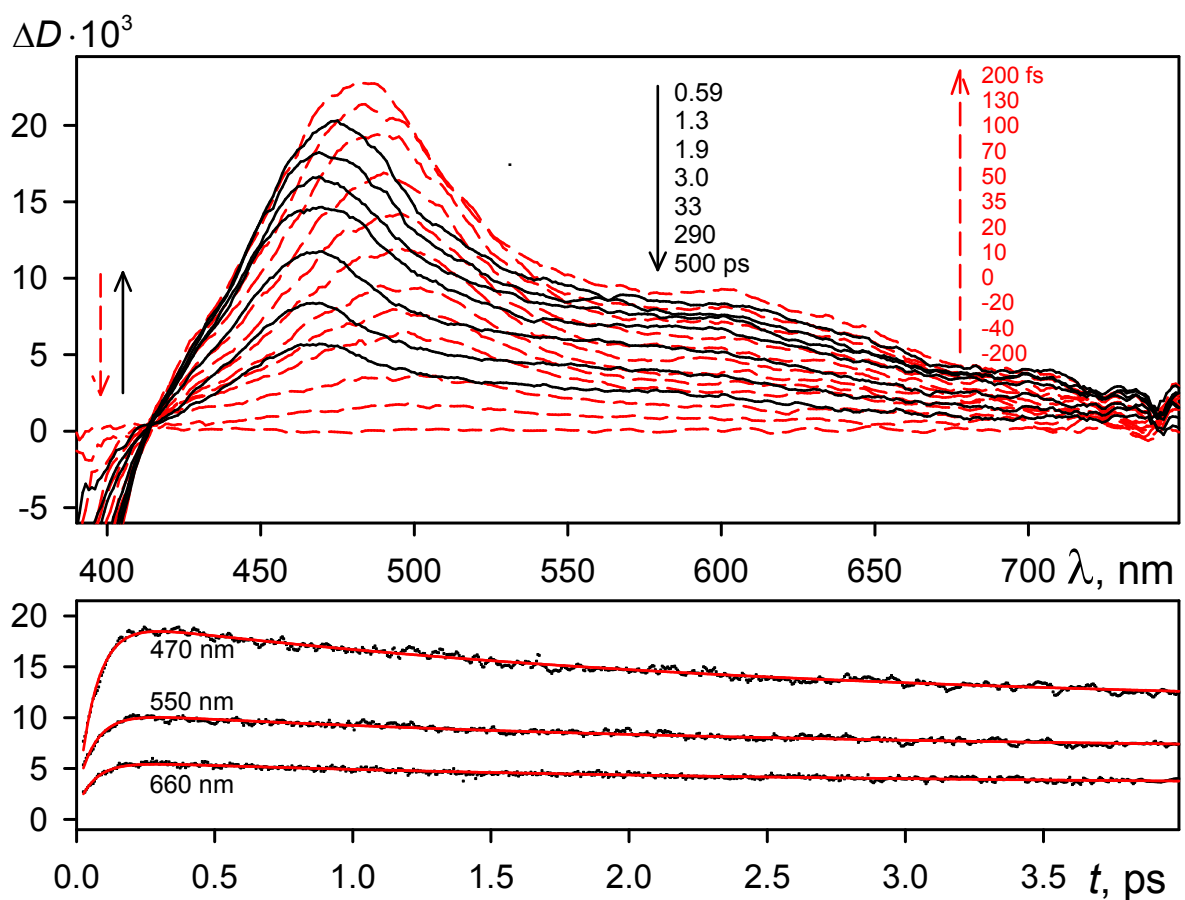

**Fig. S3** *Top panel:* The dynamics of transient absorption spectra of **A2** ( $C = 5 \times 10^{-4}$  M), which correspond to -200–200 fs delays (red dash lines) and 0.59–500 ps delays (black solid lines), after the excitation by 320 nm, 30 fs laser pulse. *Bottom panel:* The kinetic curves of transient absorption spectra for several wavelengths. The red solid lines represent fitting by two-exponential function with characteristic times 70 fs and 1.9 ps.

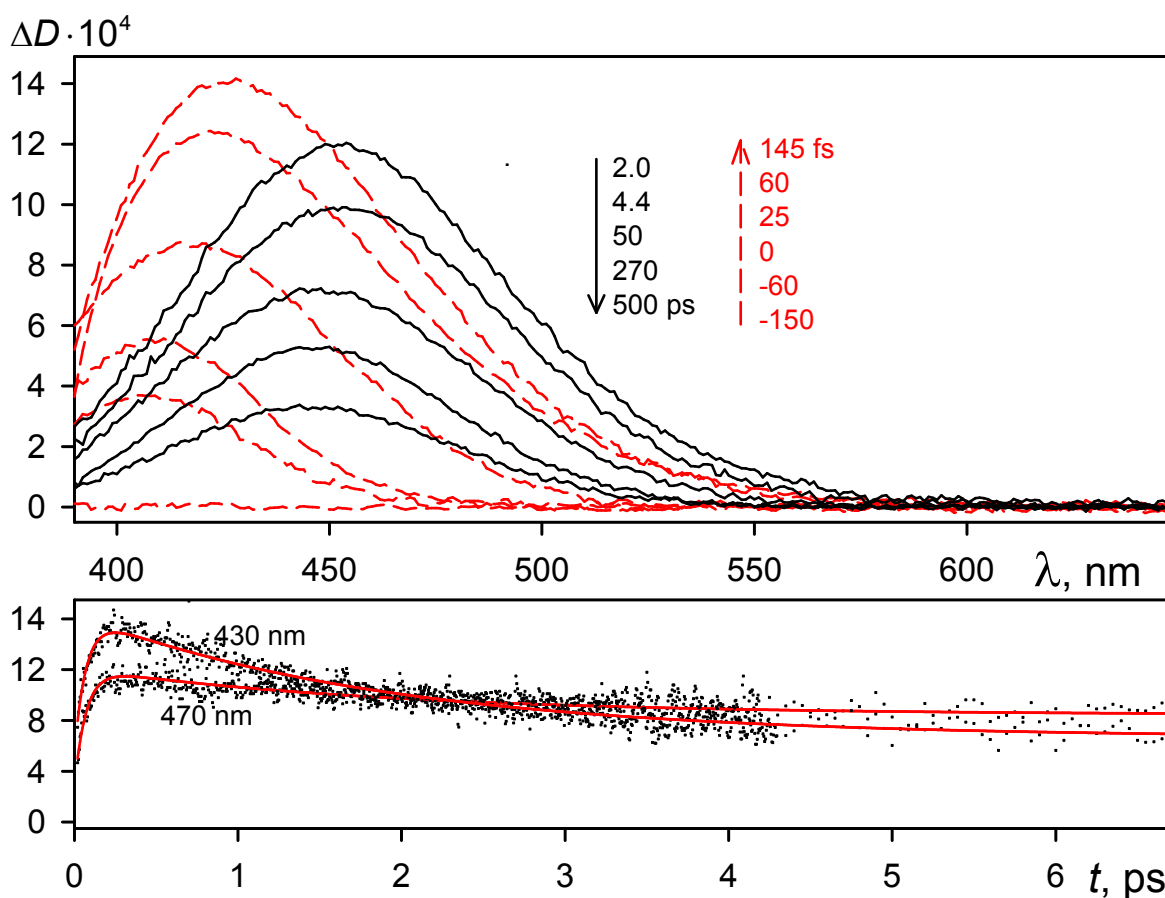

**Fig. S4** *Top panel:* The dynamics of transient absorption spectra of **A3** ( $C = 1 \times 10^{-3}$  M), which correspond to -150–145 fs delays (red dash lines) and 2–500 ps delays (black solid lines), after the excitation by 260 nm, 30 fs laser pulse. *Bottom panel:* The kinetic curves of transient absorption spectra for several wavelengths. The red solid lines represent fitting by two-exponential function with characteristic times 61 fs and 2.6 ps.

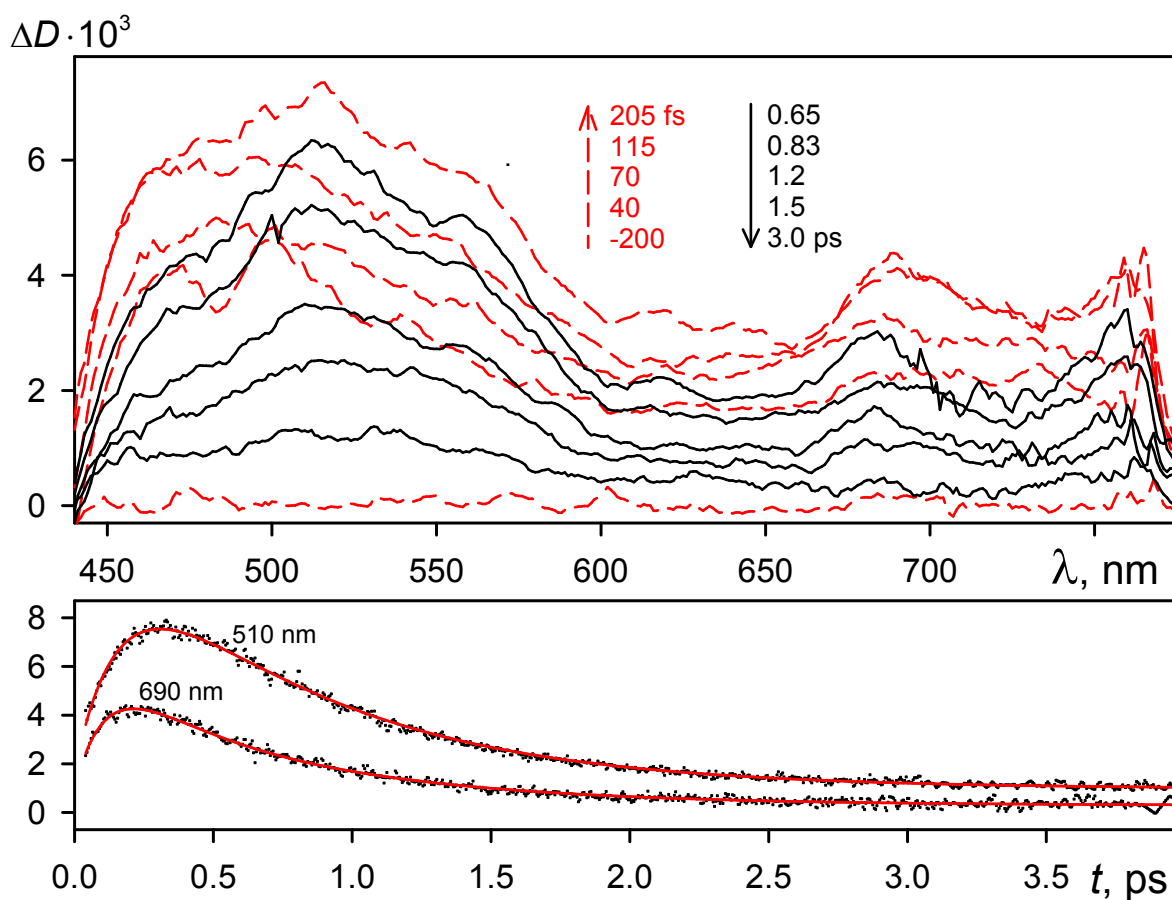

**Fig. S5** *Top panel:* The dynamics of transient absorption spectra of **D·A1·D** ( $C = 5 \times 10^{-4}$  M), which correspond to -200–205 fs delays (red dash lines) and 0.65–3.0 ps delays (black solid lines), after the excitation by 425 nm, 40 fs laser pulse. *Bottom panel:* The kinetic curves of transient absorption spectra for several wavelengths. The red solid lines represent fitting by two-exponential function with characteristic times 150 fs and 750 fs.

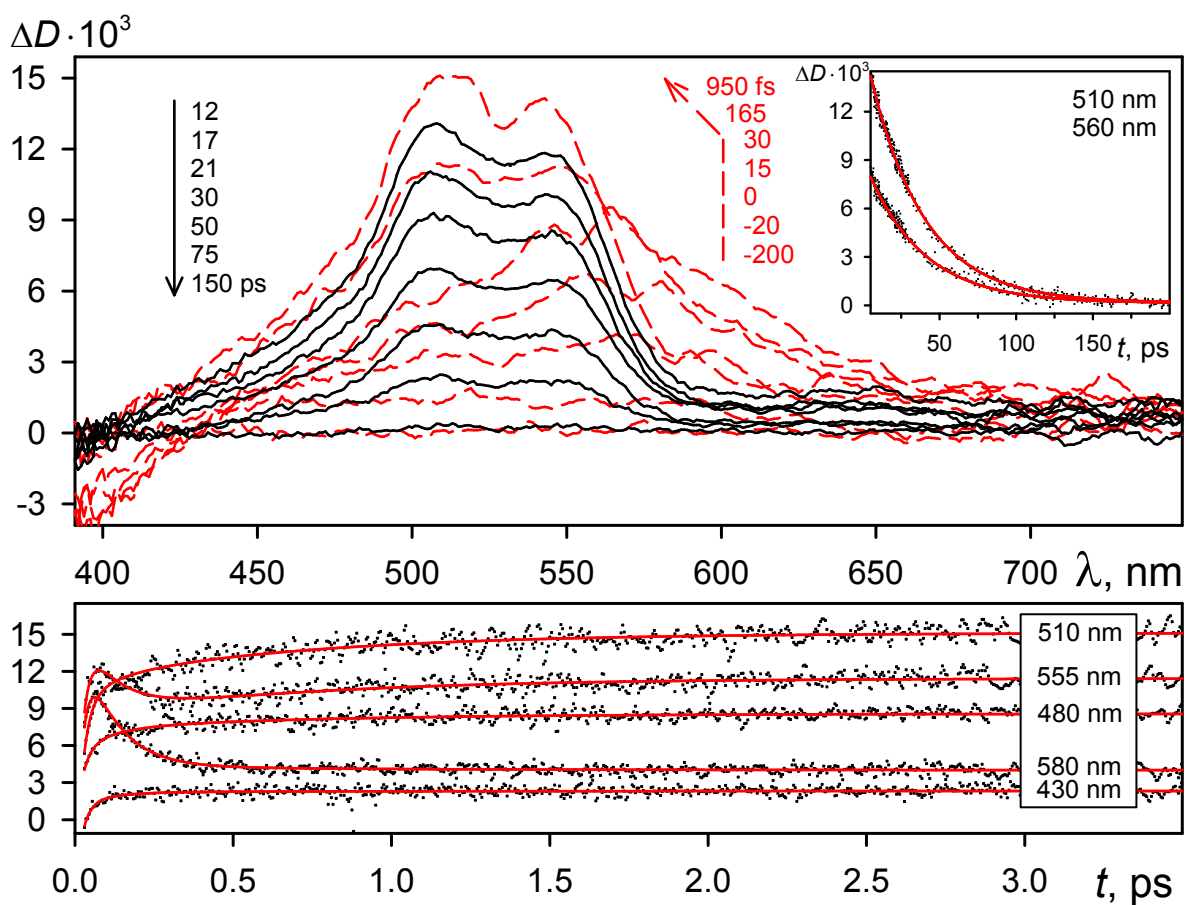

**Fig. S6** *Top panel:* The dynamics of transient absorption spectra of **D-A3** ( $C = 3.7 \times 10^{-4}$  M), which correspond to -200–950 fs delays (red dash lines) and 12–150 ps delays (black solid lines), after the excitation by 330 nm, 40 fs laser pulse. *Inset and Bottom panel:* The kinetic curves of transient absorption spectra for several wavelengths. The red solid lines represent fitting by four-exponential function with characteristic times 23 fs, 100 fs, 710 fs and 37 ps.
